# Supplementary material for: Dysregulated CXCR4 expression promotes lymphoma cell survival and independently predicts disease progression in germinal center B-cell-like diffuse large B-cell lymphoma
Source: Oncotarget. 2015 Jan 21;6(8):5597–614. doi: 10.18632/oncotarget.3343 (PMC4467389; doi:10.18632/oncotarget.3343)
Supplement: Supplementary file 1 [file oncotarget-06-5597-s001.pdf]

# Dysregulated CXCR4 expression promotes lymphoma cell survival and independently predicts disease progression in germinal center B-cell-like diffuse large B-cell lymphoma

## Supplementary Material

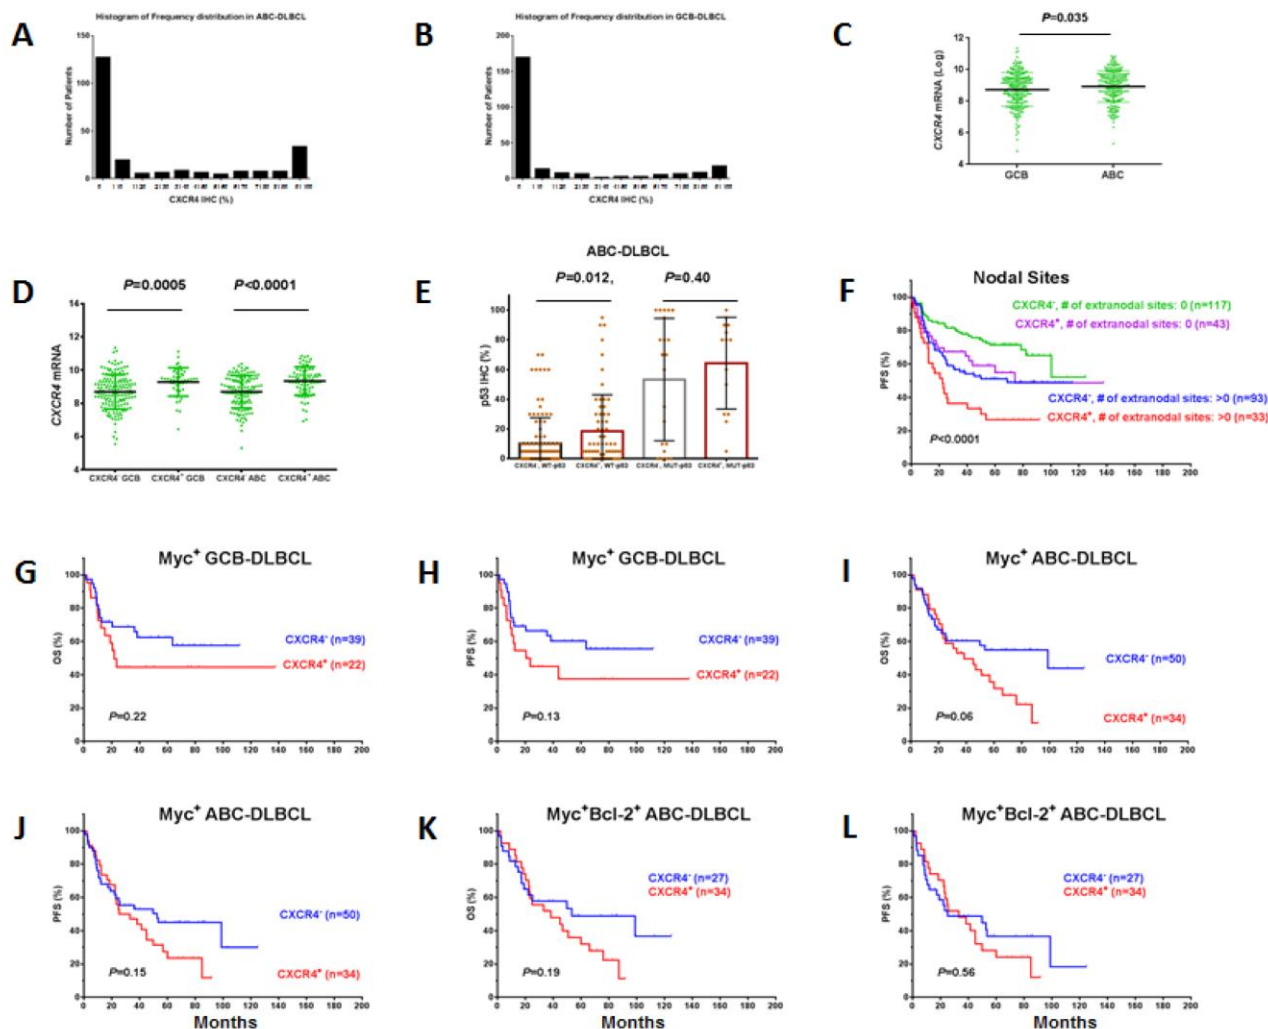

**Supplemental Figure 1:** (A-B) Histograms showing the distribution of CXCR4 expression frequency in the ABC- and GCB-DLBCL subcohort. X-axis, percentage of immunopositive cells in tumors; Y-axis, numbers of DLBCL patients. (C) ABC-DLBCL compared to GCB-DLBCL had increased CXCR4 mRNA expression. (D) Correlation between CXCR4 surface expression and mRNA levels. (E) CXCR4 expression was associated with increased WT-p53 expression in ABC-DLBCL. (F) Impact of CXCR4 expression on survival of nodal LDBCL with or without extranodal involvement. (G-J) Impact of CXCR4 expression on Myc-overexpressing GCB- and ABC-DLBCL. (K-L) Impact of CXCR4 expression in ABC-DLBCL with concurrent Myc/Bcl-2 expression.

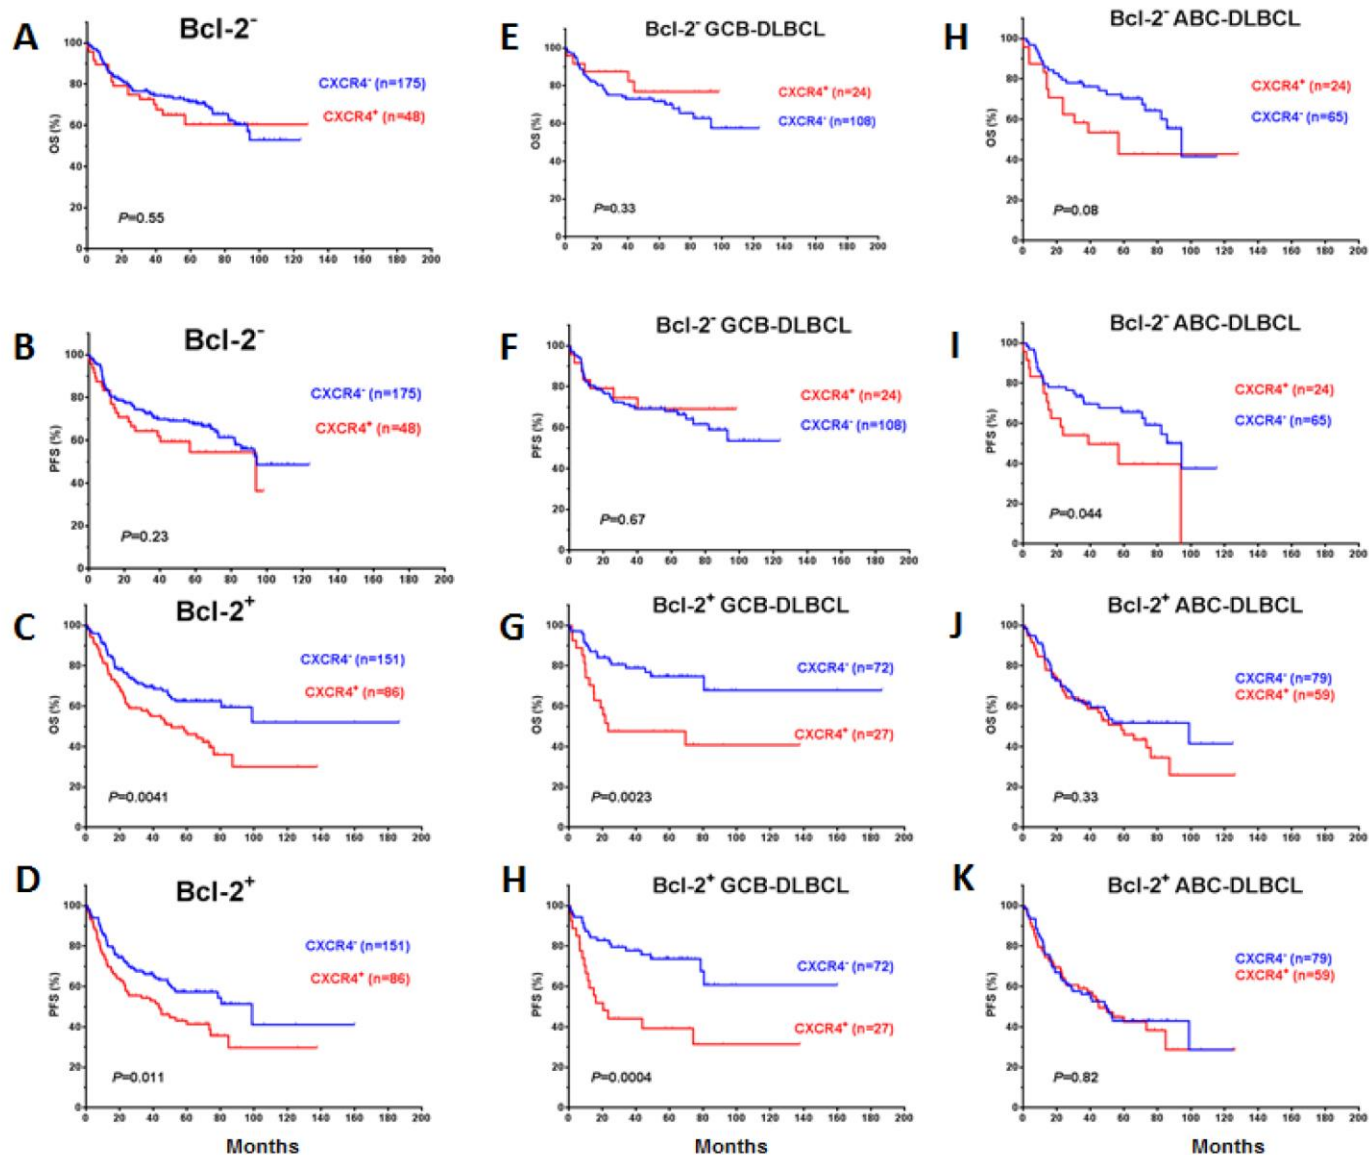

**Supplemental Figure 2:** Prognostic significance of CXCR4 expression in patients with or without Bcl-2 expression.

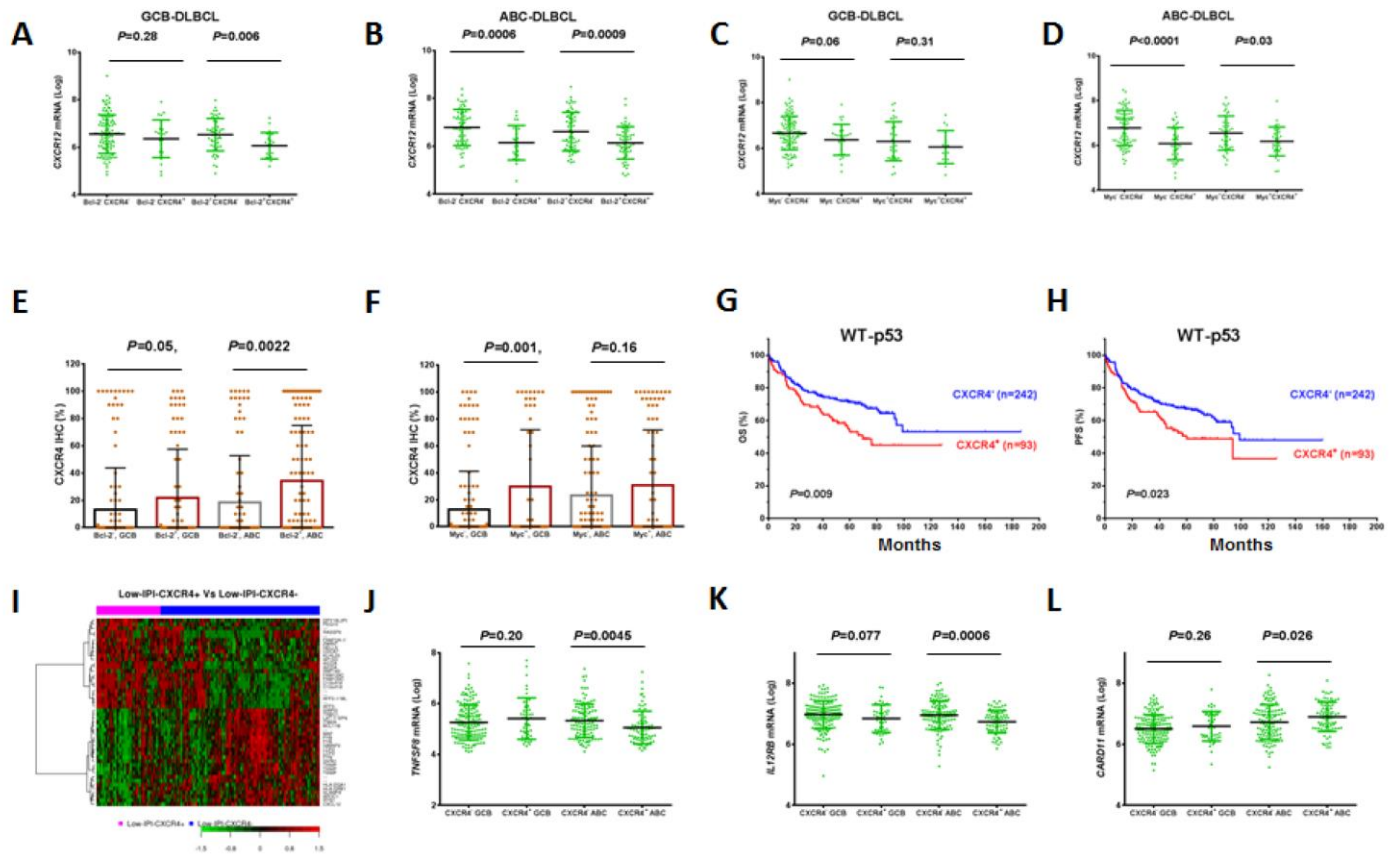

**Supplemental Figure 3:** (A-D) CXCR4 cell surface expression correlated with decreased *CXCL12* mRNA levels, independent of Bcl-2 and Myc overexpression status. (E-F) Myc/Bcl-2 expression was associated with CXCR4 cell surface expression, both in GCB- and ABC-DLBCL ( $P$  value for Myc<sup>+</sup> ABC-DLBCL was not significant). (G-H) CXCR4 expression correlated with significantly poor OS and PFS in DLBCL patients with WT-p53. (I) Heatmaps and differentially expressed genes between CXCR4<sup>+</sup> and CXCR4<sup>-</sup> DLBCL patients with an IPI of 2 or lower. (J-L) Differential regulation of *TNFSF8*, *IL12RB*, and *CARD11* by CXCR4 signaling between GCB- and ABC-DLBCL.

## Validation set

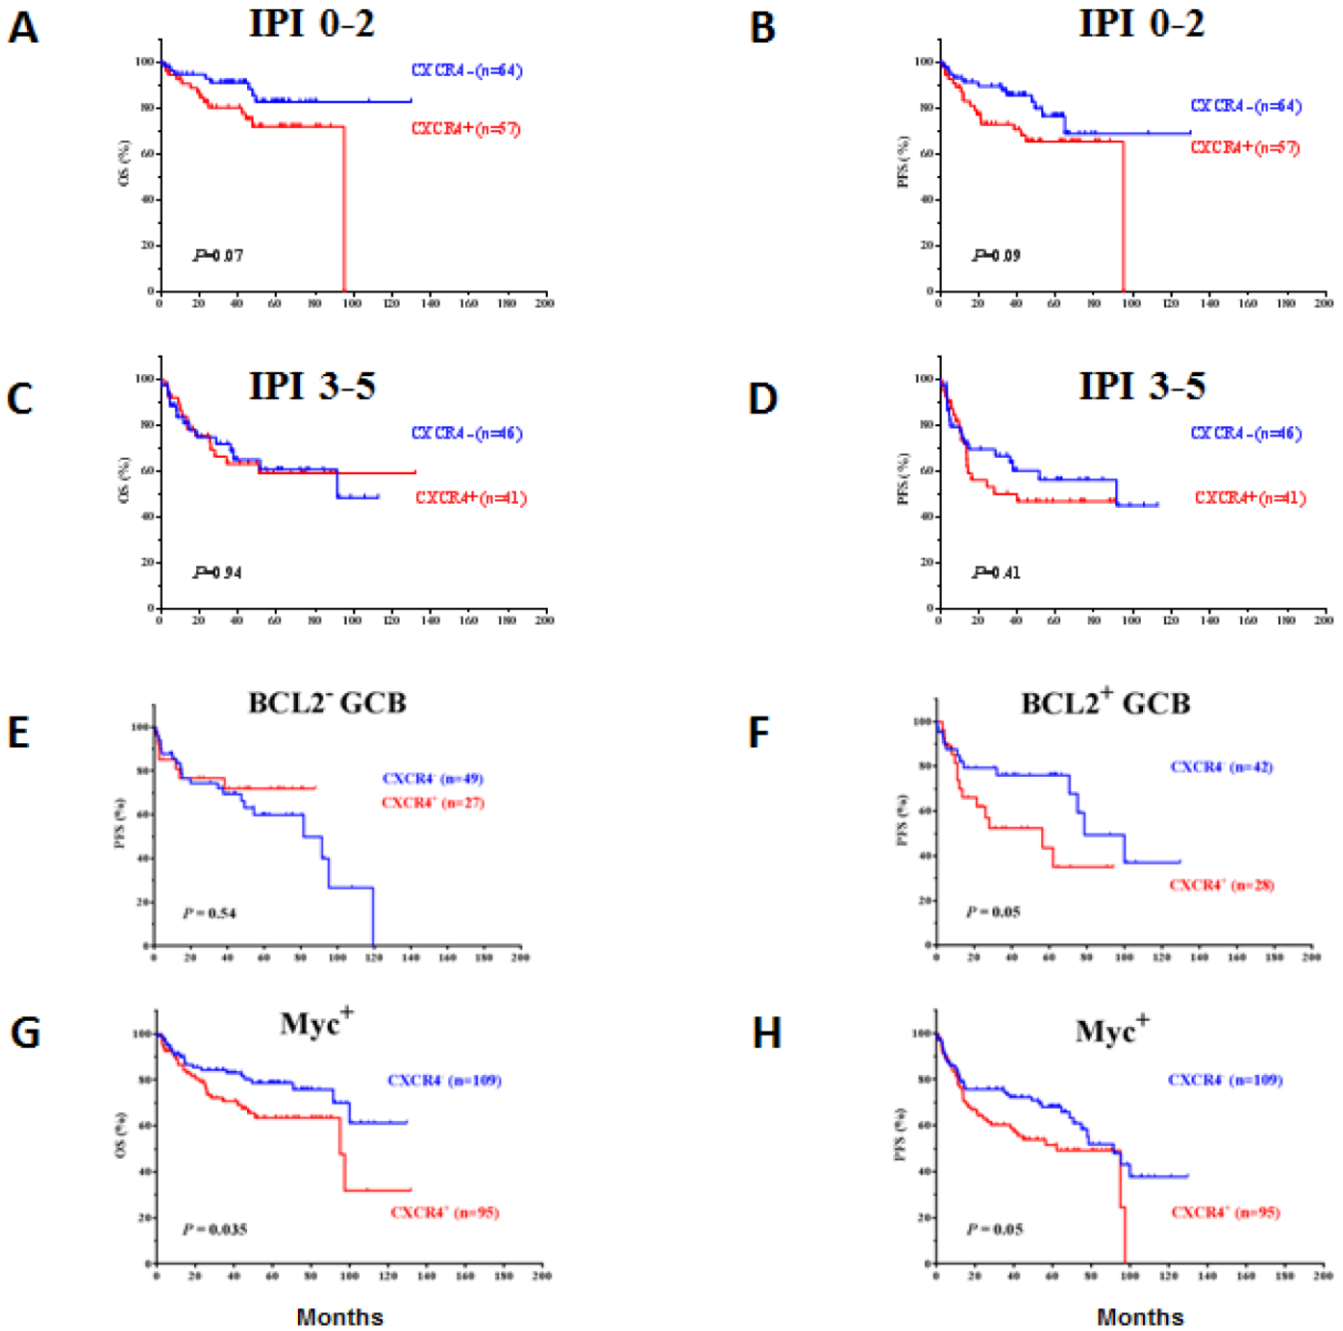

**Supplemental Figure 4:** Prognostic impact of CXCR4 expression in the validation set of 275 *de novo*

DLBCL patients.

**In DLBCL CXCR4<sup>+</sup> associated Network 1:** Cellular Movement, Hematological System Development and Function, Immune Cell Trafficking

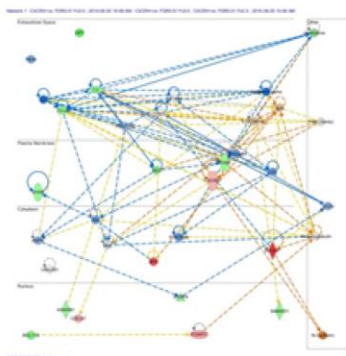

**In DLBCL CXCR4<sup>+</sup> associated Network 2:** Cellular Movement, Hematopoiesis, Immune Cell Trafficking

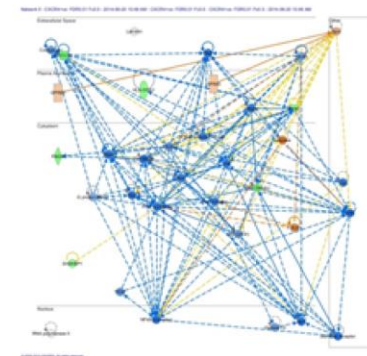

**In DLBCL CXCR4<sup>+</sup> associated Network 3:** Hematological System Development and Function, Tissue Morphology, Hematopoiesis

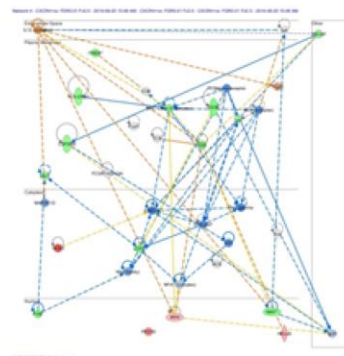

**In GCB-DLBCL CXCR4<sup>+</sup> associated Network 1:** Cardiovascular System Development and Function, Cellular Function and Maintenance, Cellular Growth and Proliferation

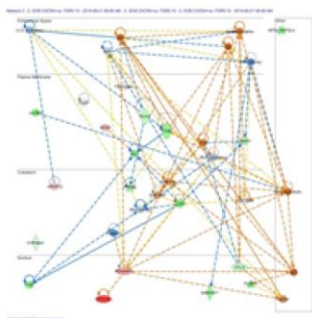

**In GCB-DLBCL CXCR4<sup>+</sup> associated Network 2:** Cell-To-Cell Signaling and Interaction, Nervous System Development and Function, Gastrointestinal Disease

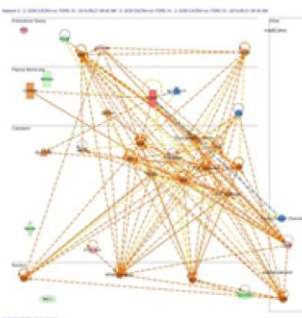

**In ABC-DLBCL CXCR4<sup>+</sup> associated Network 1:** Cell-To-Cell Signaling and Interaction, Hematological System Development and Function, Cell Death and Survival

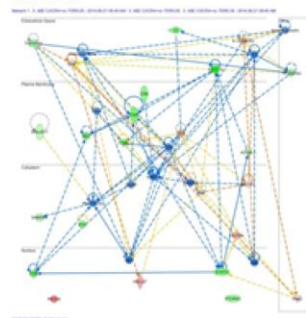

**In ABC-DLBCL CXCR4<sup>+</sup> associated Network 2:** Hematological System Development and Function, Humoral Immune Response, Cancer

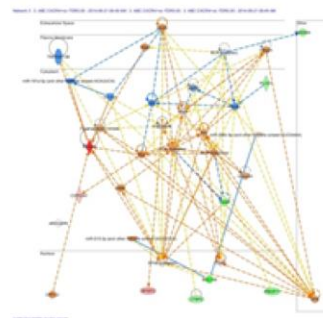

**Supplemental Figure 5:** Associated networks for CXCR4 signatures by IPA software analysis.
